# Supplementary material for: Synergistic luminescent thermometer using co-doped Ca2GdSbO6:Mn4+/(Eu3+ or Sm3+) phosphors
Source: Royal Society of Chemistry journal article supplement (doi:10.1039/d2dt00005a), 2022-01-01
Supplement: d2dt00005a1.pdf [file d2dt00005a1.pdf]

## Supporting Information

### Synergistic Luminescent Thermometer of Co-doped $\text{Ca}_2\text{GdSbO}_6:\text{Mn}^{4+}/(\text{Eu}^{3+} \text{ or } \text{Sm}^{3+})$ Phosphors

Guixian Li <sup>a</sup>, Yu Xue <sup>a</sup>, Qinan Mao <sup>a</sup>, Lang Pei <sup>a</sup>, Hong He <sup>a</sup>, Meijiao Liu <sup>b</sup>, Liang Chu <sup>c,\*</sup>,  
Jiasong Zhong <sup>a,\*</sup>

<sup>a</sup> Center of Advanced Optoelectronic Materials, College of Materials and Environmental  
Engineering, Hangzhou Dianzi University, Hangzhou 310018, China

<sup>b</sup> Department of Chemistry, Zhejiang Sci-Tech University, Hangzhou 310018, China

<sup>c</sup> New Energy Technology Engineering Laboratory of Jiangsu Province, School of Science,  
Nanjing University of Posts and Telecommunications, Nanjing 210023, China

Corresponding authors:

E-mail: chuliang@njupt.edu.cn (L. Chu), jiasongzhong@hdu.edu.cn (J.S. Zhong)

**Table S1** Structural data for  $\text{Ca}_2\text{GdSbO}_6$  and refined crystallographic parameters of the  $\text{Ca}_2\text{GdSbO}_6:\text{Mn}^{4+}/\text{Eu}^{3+}$  and  $\text{Ca}_2\text{GdSbO}_6:\text{Mn}^{4+}/\text{Sm}^{3+}$ .

|                         | $\text{Ca}_2\text{GdSbO}_6$ | $\text{Ca}_2\text{GdSbO}_6:\text{Mn}^{4+}/\text{Eu}^{3+}$ | $\text{Ca}_2\text{GdSbO}_6:\text{Mn}^{4+}/\text{Sm}^{3+}$ |
|-------------------------|-----------------------------|-----------------------------------------------------------|-----------------------------------------------------------|
| Crystal system          | monoclinic                  | monoclinic                                                | monoclinic                                                |
| Space group             | $\text{P12}_1/\text{n1}$    | $\text{P12}_1/\text{n1}$                                  | $\text{P12}_1/\text{n1}$                                  |
| Units $Z$               | 2                           | 2                                                         | 2                                                         |
| $a$ (Å)                 | 5.5720(8)                   | 5.5860(3)                                                 | 5.5859(6)                                                 |
| $b$ (Å)                 | 5.8530(9)                   | 5.8485(3)                                                 | 5.8487(2)                                                 |
| $c$ (Å)                 | 8.085(1)                    | 8.0819(3)                                                 | 8.0825(3)                                                 |
| $\alpha = \gamma$ (deg) | 90                          | 90                                                        | 90                                                        |
| $\beta$ (deg)           | 90.250(5)                   | 90.284(2)                                                 | 90.281(1)                                                 |
| $V$ (Å <sup>3</sup> )   | 263.7(1)                    | 264.0(5)                                                  | 264.0(7)                                                  |
| $R_p$ (%)               |                             | 6.36                                                      | 6.22                                                      |
| $R_{wp}$ (%)            |                             | 8.28                                                      | 8.12                                                      |
| $\chi^2$                |                             | 1.37                                                      | 1.28                                                      |

**Table S2** Fitting parameters of Equation (1) (LIR as a function of temperature) for the  $\text{Mn}^{4+}/\text{yEu}^{3+}$  and  $\text{Mn}^{4+}/\text{zSm}^{3+}$  co-doped  $\text{Ca}_2\text{GdSbO}_6$  samples.

| Samples | D                    | F                          | $\Delta E_2$        | $R^2$  |
|---------|----------------------|----------------------------|---------------------|--------|
| 1%Eu    | $30.7218 \pm 0.6267$ | $6012.9303 \pm 1286.1863$  | $0.2743 \pm 0.0081$ | 0.9991 |
| 5%Eu    | $11.2228 \pm 0.1883$ | $6609.6339 \pm 1237.9488$  | $0.2789 \pm 0.0071$ | 0.9993 |
| 10%Eu   | $9.1320 \pm 1.5275$  | $1034.8536 \pm 296.7241$   | $0.1860 \pm 0.0155$ | 0.9943 |
| 1%Sm    | $40.8203 \pm 0.7125$ | $12767.7802 \pm 3545.0571$ | $0.3093 \pm 0.0103$ | 0.9988 |
| 3%Sm    | $13.9917 \pm 0.1017$ | $18989.1703 \pm 2348.5704$ | $0.3209 \pm 0.0045$ | 0.9998 |
| 5%Sm    | $20.8857 \pm 0.2688$ | $11589.2459 \pm 2457.8008$ | $0.3093 \pm 0.0079$ | 0.9993 |

**Table S3** Thermometric performance of luminescent thermometers based on Mn<sup>4+</sup>-Ln<sup>3+</sup> ions.

| Host                                             | Ln <sup>3+</sup> | $S_r$ (%K <sup>-1</sup> ) | Temperature range (K) | Reference |
|--------------------------------------------------|------------------|---------------------------|-----------------------|-----------|
| La <sub>2</sub> LiSbO <sub>6</sub>               | Eu <sup>3+</sup> | 0.89 (503K)               | 303-523               | [1]       |
| CaGdMgSbO <sub>6</sub>                           | Sm <sup>3+</sup> | 1.38 (548K)               | 298-573               | [2]       |
| Ca <sub>2</sub> LaNbO <sub>6</sub>               | Eu <sup>3+</sup> | 1.51 (455K)               | 298-498               | [3]       |
| Ba <sub>2</sub> LaNbO <sub>6</sub>               | Eu <sup>3+</sup> | 2.08 (398K)               | 298-498               | [3]       |
| NaLaMgWO <sub>6</sub>                            | Eu <sup>3+</sup> | 0.86 (523K)               | 303-523               | [4]       |
| LuAG                                             | Eu <sup>3+</sup> | 0.70 (303K)               | 303-358               | [5]       |
| Sr <sub>4</sub> Al <sub>14</sub> O <sub>25</sub> | Tb <sup>3+</sup> | 2.80 (423K)               | 123-523               | [6]       |
| CaGdAlO <sub>4</sub>                             | Tb <sup>3+</sup> | 2.30 (398K)               | 230-470               | [7]       |
| BaLaMgNbO <sub>6</sub>                           | Dy <sup>3+</sup> | 1.82 (457K)               | 298-523               | [8]       |
| YAlO <sub>3</sub>                                | Ho <sup>3+</sup> | 1.17 (450K)               | 293-563               | [9]       |
| YAlO <sub>3</sub>                                | Er <sup>3+</sup> | 1.95 (530K)               | 293-563               | [9]       |
| Ca <sub>2</sub> GdSbO <sub>6</sub>               | Eu <sup>3+</sup> | 1.38 (420K)               | 303-523               | This work |
| Ca <sub>2</sub> GdSbO <sub>6</sub>               | Sm <sup>3+</sup> | 1.55 (430K)               | 303-523               | This work |

**Table S4** The detailed integration interval of the emission peaks of Mn<sup>4+</sup>, Eu<sup>3+</sup>, Sm<sup>3+</sup>.

| Emission peak                                                                    | Integration interval (nm) |
|----------------------------------------------------------------------------------|---------------------------|
| Mn <sup>4+</sup> : <sup>2</sup> E→ <sup>4</sup> A <sub>2</sub>                   | 650 - 695                 |
| Eu <sup>3+</sup> : <sup>5</sup> D <sub>0</sub> → <sup>7</sup> F <sub>2</sub>     | 605 - 630                 |
| Sm <sup>3+</sup> : <sup>4</sup> G <sub>5/2</sub> → <sup>6</sup> H <sub>7/2</sub> | 580 - 620                 |

\*The emission spectrum is not deconvoluted.

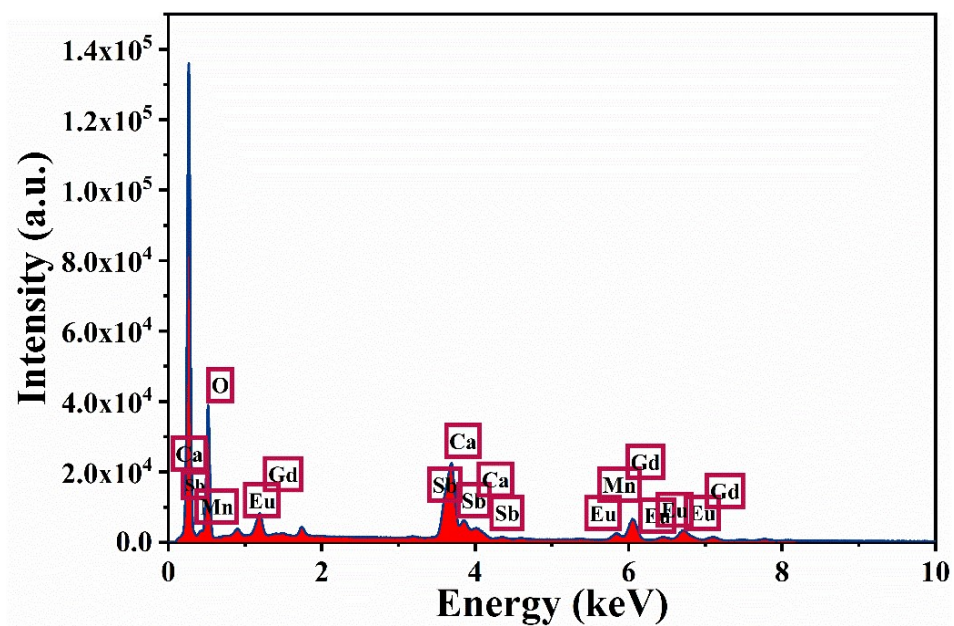

Fig. S1 EDX spectrum of  $\text{Ca}_2\text{GdSbO}_6:\text{Mn}^{4+}, \text{Eu}^{3+}$  samples.

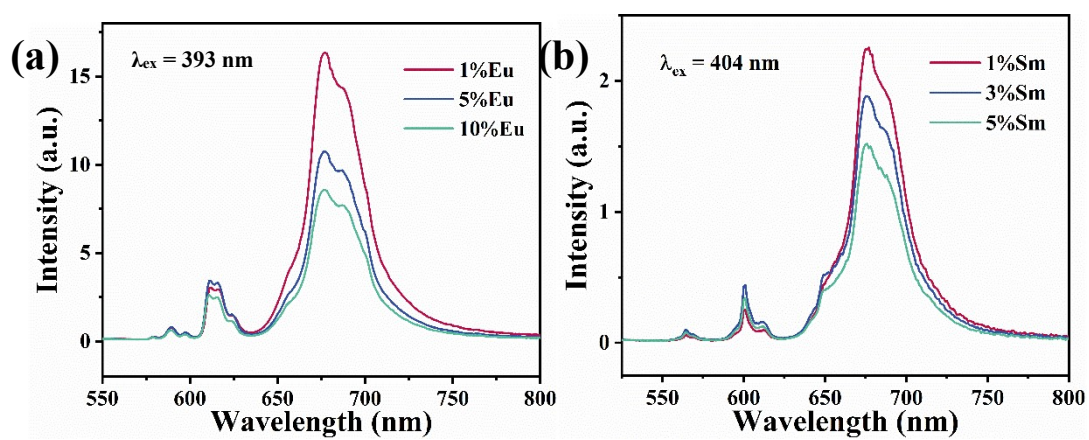

Fig. S2 The room temperature PL spectra of (a)  $\text{Ca}_2\text{GdSbO}_6:\text{Mn}^{4+}/y\text{Eu}^{3+}$ , and (b)  $\text{Ca}_2\text{GdSbO}_6:\text{Mn}^{4+}/z\text{Sm}^{3+}$  phosphors.

## References

- 1 Y. Song, N. Guo, J. Li, R. Ouyang, Y. Miao and B. Shao, Photoluminescence and temperature sensing of lanthanide  $\text{Eu}^{3+}$  and transition metal  $\text{Mn}^{4+}$  dual-doped antimoniate phosphor through site-beneficial occupation, *Ceram. Int.*, 2020, **46**, 22164-22170.
- 2 J. Liao, M. Wang, L. Kong, J. Chen, X. Wang, H. Yan, J. Huang and C. Tu, Dual-mode optical temperature sensing behavior of double-perovskite  $\text{CaGdMgSbO}_6:\text{Mn}^{4+}/\text{Sm}^{3+}$  phosphors, *J. Lumin.*, 2020, **226**, 117492.
- 3 P. Wang, J. Mao, L. Zhao, B. Jiang, C. Xie, Y. Lin, F. Chi, M. Yin and Y. Chen, Double perovskite  $\text{A}_2\text{LaNbO}_6:\text{Mn}^{4+},\text{Eu}^{3+}$  (A = Ba, Ca) phosphors: Potential applications in optical temperature sensing, *Dalton Trans.*, 2019, **48**, 10062-10069.
- 4 H. Zhou, N. Guo, M. Zhu, J. Li, Y. Miao and B. Shao, Photoluminescence and ratiometric optical thermometry in  $\text{Mn}^{4+}/\text{Eu}^{3+}$  dual-doped phosphor via site-favorable occupation, *J. Lumin.*, 2020, **224**, 117311.
- 5 B. Yan, Y. Wei, W. Wang, M. Fu and G. Li, Red-tunable LuAG garnet phosphors via  $\text{Eu}^{3+}\rightarrow\text{Mn}^{4+}$  energy transfer for optical thermometry sensor application, *Inorg. Chem. Front.*, 2021, **8**, 746-757.
- 6 W. Piotrowski, K. Trejgis, K. Maciejewska, K. Ledwa, B. Fond and L. Marciniak, Thermochromic luminescent nanomaterials based on  $\text{Mn}^{4+}/\text{Tb}^{3+}$  codoping for temperature imaging with digital cameras, *ACS Appl. Mater. Interfaces*, 2020, **12**, 44039-44048.
- 7 Y. Fang, Y. Zhang, Y. Zhang and J. Hu, Achieving high thermal sensitivity from ratiometric  $\text{CaGdAlO}_4:\text{Mn}^{4+},\text{Tb}^{3+}$  thermometers. *Dalton Trans.* 2021, **50**, 13447-13458.
- 8 Y. Lin, L. Zhao, B. Jiang, J. Mao, F. Chi, P. Wang, C. Xie, X. Wei, Y. Chen and M. Yin, Temperature-dependent luminescence of  $\text{BaLaMgNbO}_6:\text{Mn}^{4+},\text{Dy}^{3+}$  phosphor for dual-mode optical thermometry. *Opt. Mater.* 2019, **95**, 109199.
- 9 D. Chen, W. Xu, S. Yuan, X. Li and J. Zhong,  $\text{Ln}^{3+}$ -sensitized  $\text{Mn}^{4+}$  near-infrared upconverting luminescence and dual-modal temperature sensing. *J. Mater. Chem. C* 2017, **5**, 9619-9628.
